# Supplementary material for: Self-assembly of supramolecular aptamer structures for optical or electrochemical sensing
Source: Royal Society of Chemistry journal article supplement (doi:10.1039/b822836c), 2009-01-01
Supplement: b822836c.pdf [file b822836c.pdf]

Supplementary Information

# Self-Assembly of Supramolecular Aptamer Structures for Optical or Electrochemical Sensing

*Ronit Freeman, Yang Li, Ran Tel-Vered, Etery Sharon, Johann Elbaz*

*and Itamar Willner\**

Institute of Chemistry, The Hebrew University of Jerusalem, Jerusalem 91904, Israel

**Analyzing ATP using a self-assembled redox active supramolecular structure of aptamer subunits:**

The thiolated nucleic acid 5'-HS-ATACCTGGGGGAGTATATAAT-3' was assembled on a Au surface, and the amino-functionalized nucleic acid 5'-ATTATAGCGGAGGAAGGTAT-(CH<sub>2</sub>)<sub>6</sub>NH<sub>2</sub>-3' was modified with methylene blue to yield the redox labeled nucleic acid.

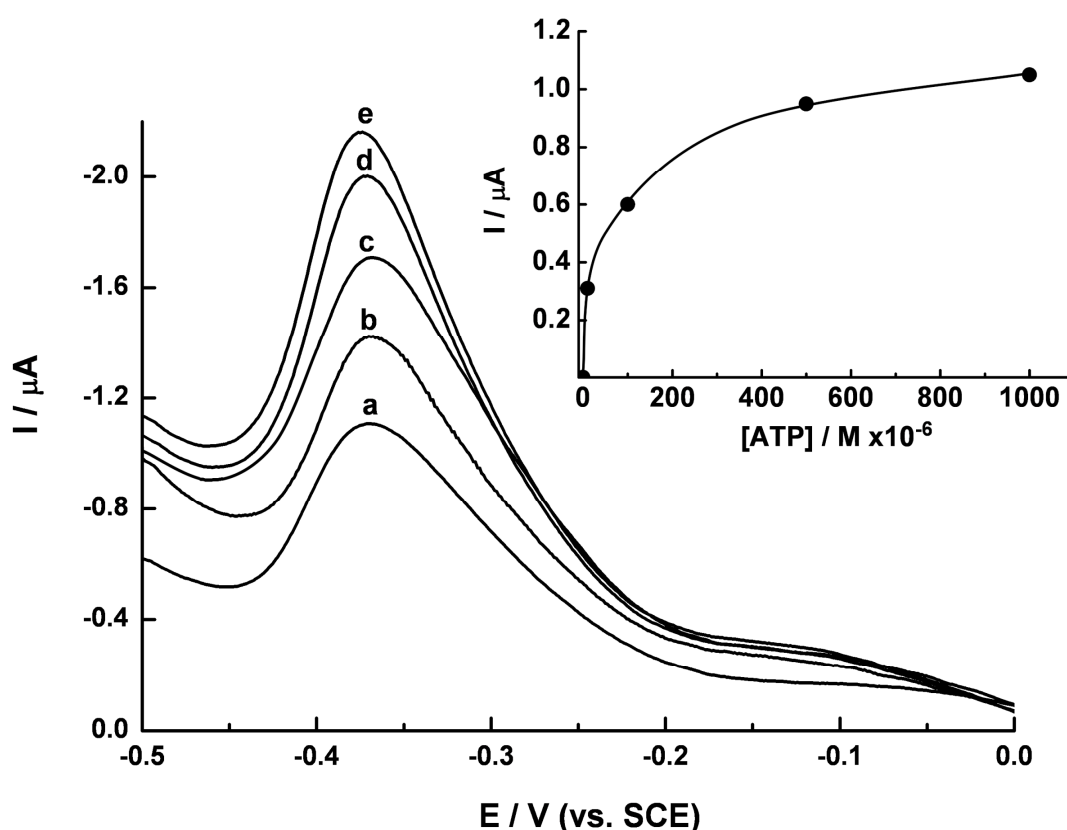

**Figure S1:** Linear sweep voltammograms corresponding to the analysis of variable concentrations of ATP: (a) 0 M.(b) 1×10<sup>-5</sup> M. (c) 1×10<sup>-4</sup> M. (d) 5×10<sup>-4</sup> M. (e) 1×10<sup>-3</sup> M. All experiments were performed in the presence of the (3)-functionalized electrode and (2) 1×10<sup>-5</sup> M. Voltammograms were recorded under argon after equilibration of the system for 20 minutes.

**Inset:** Calibration curve corresponding to the analysis of cocaine by the (3)-modified Au electrode and MB<sup>+</sup>-functionalized (2) as redox reporter. ATP could be analyzed by the functionalized electrode with a sensitivity that corresponded to 1×10<sup>-5</sup> M.
